# Supplementary material for: Genome-Wide Screening in Human Embryonic Stem Cells Highlights the Hippo Signaling Pathway as Granting Synthetic Viability in ATM Deficiency
Source: MDPI journal article supplement (doi:10.3390/cells12111503), 2023-05-29
Supplement: s1 [file s1]

A

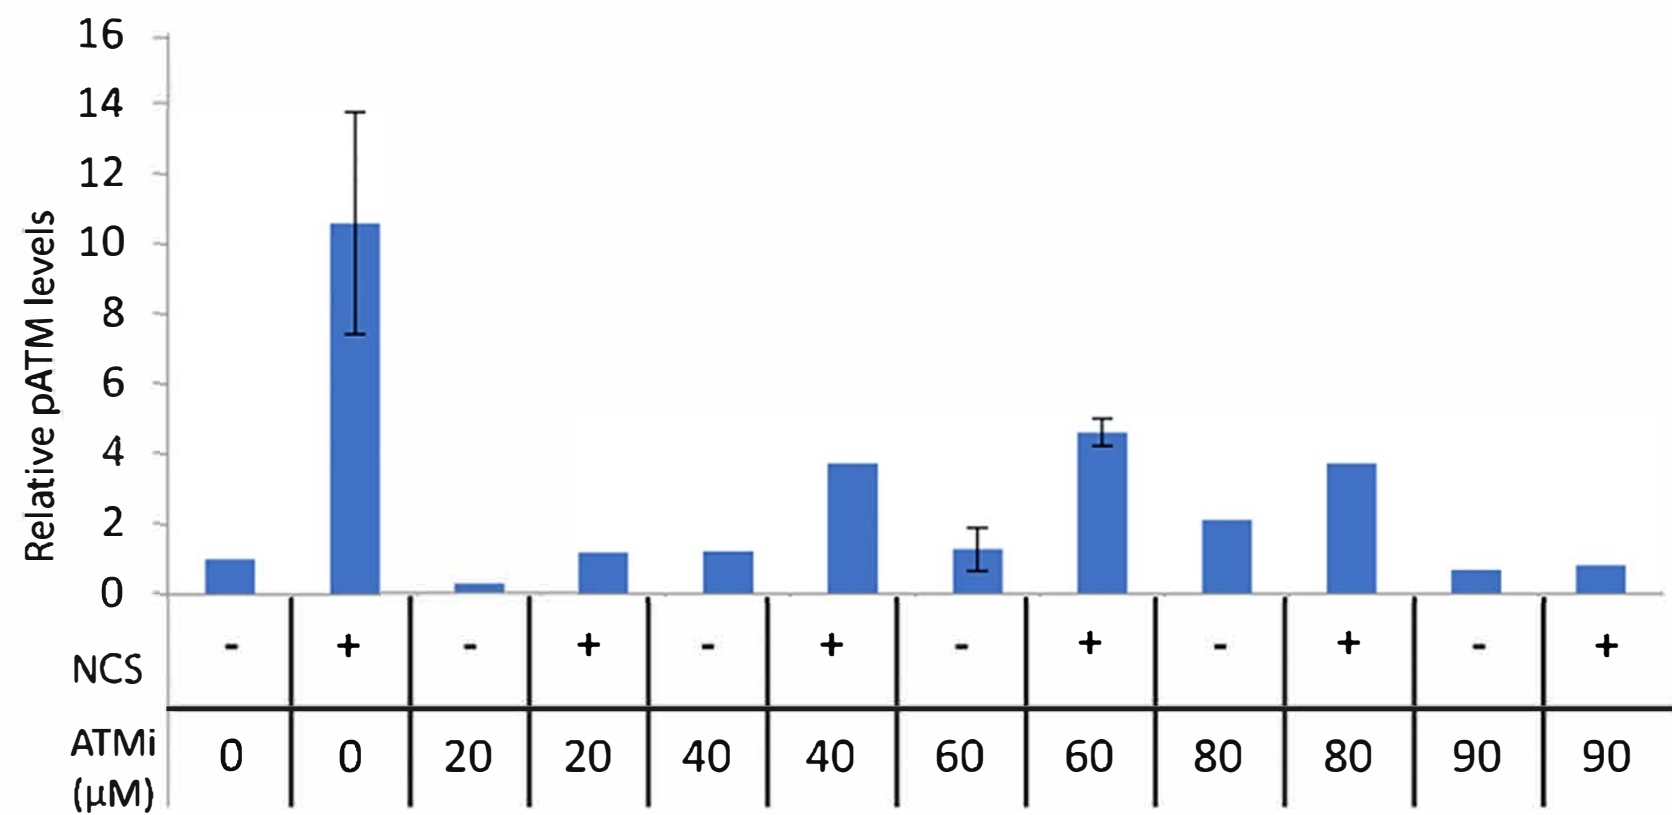

B

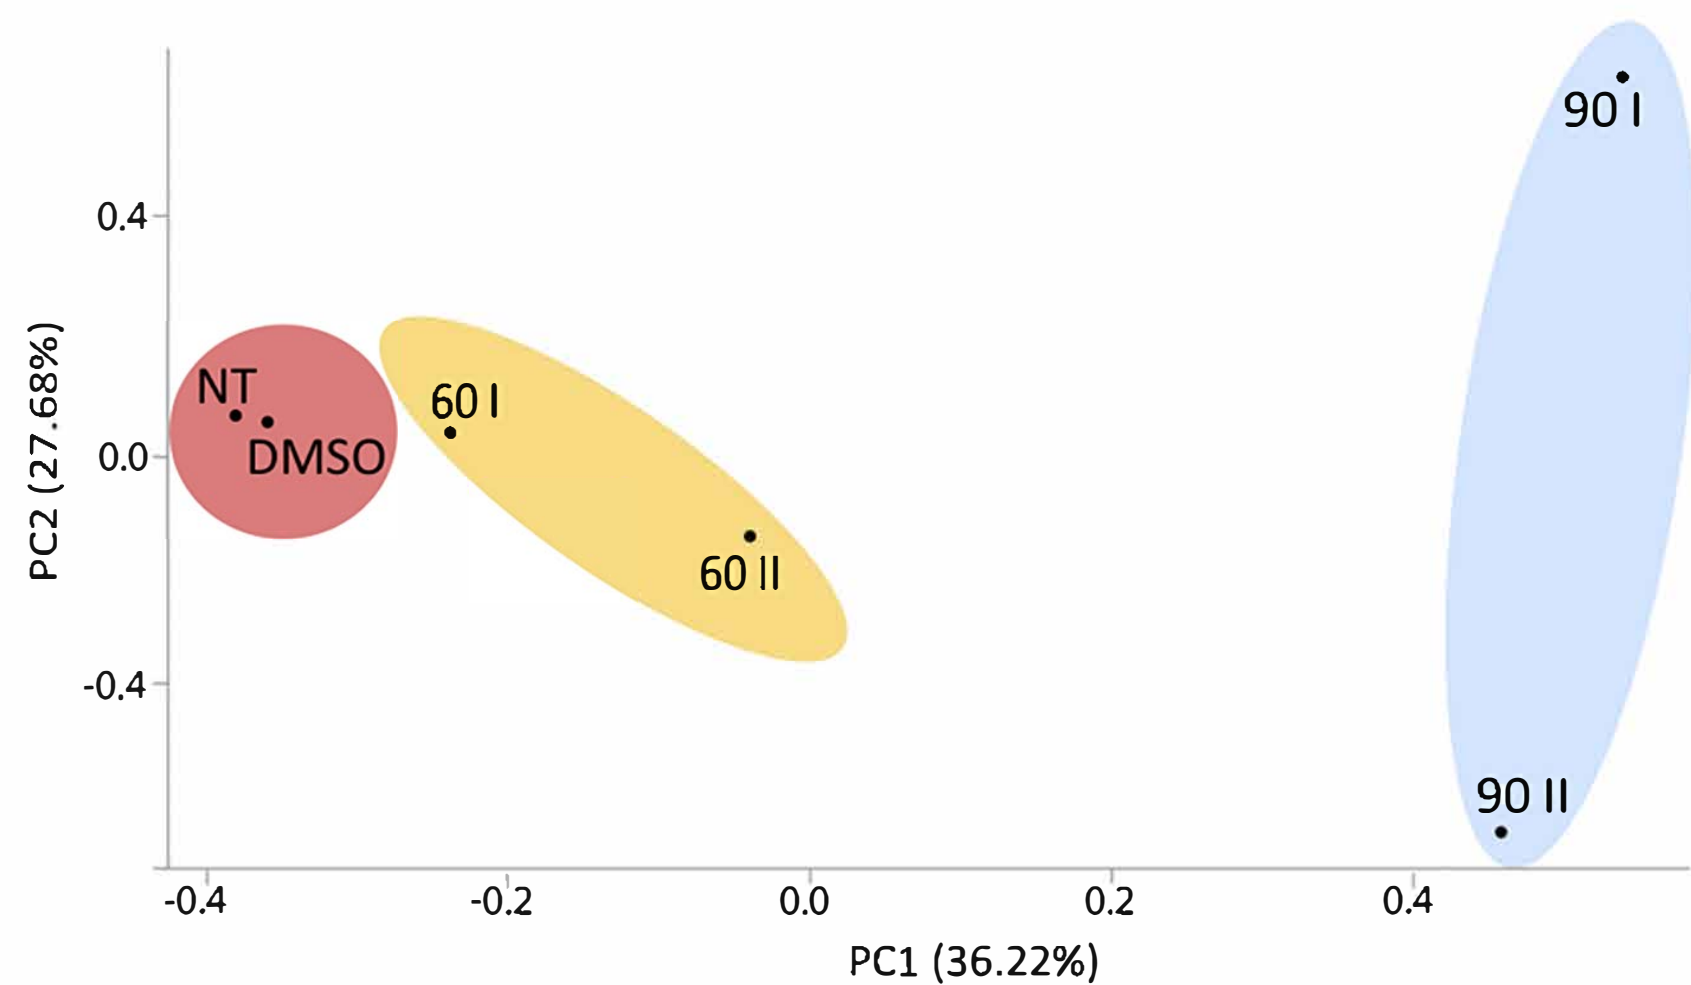

**Supplementary Figure S1.** Effect of ATMi on hESCs. **(A)** Bar graph summarizing western-blot analyses of phospho-ATM levels following treatment with increasing concentrations of ATMi, with or without DNA damage induction by NCS. Results are normalized to GAPDH protein levels, and to no treatment control. **(B)** PCA plot depicting the distance between count values of cells treated with different concentrations of ATMi.

A

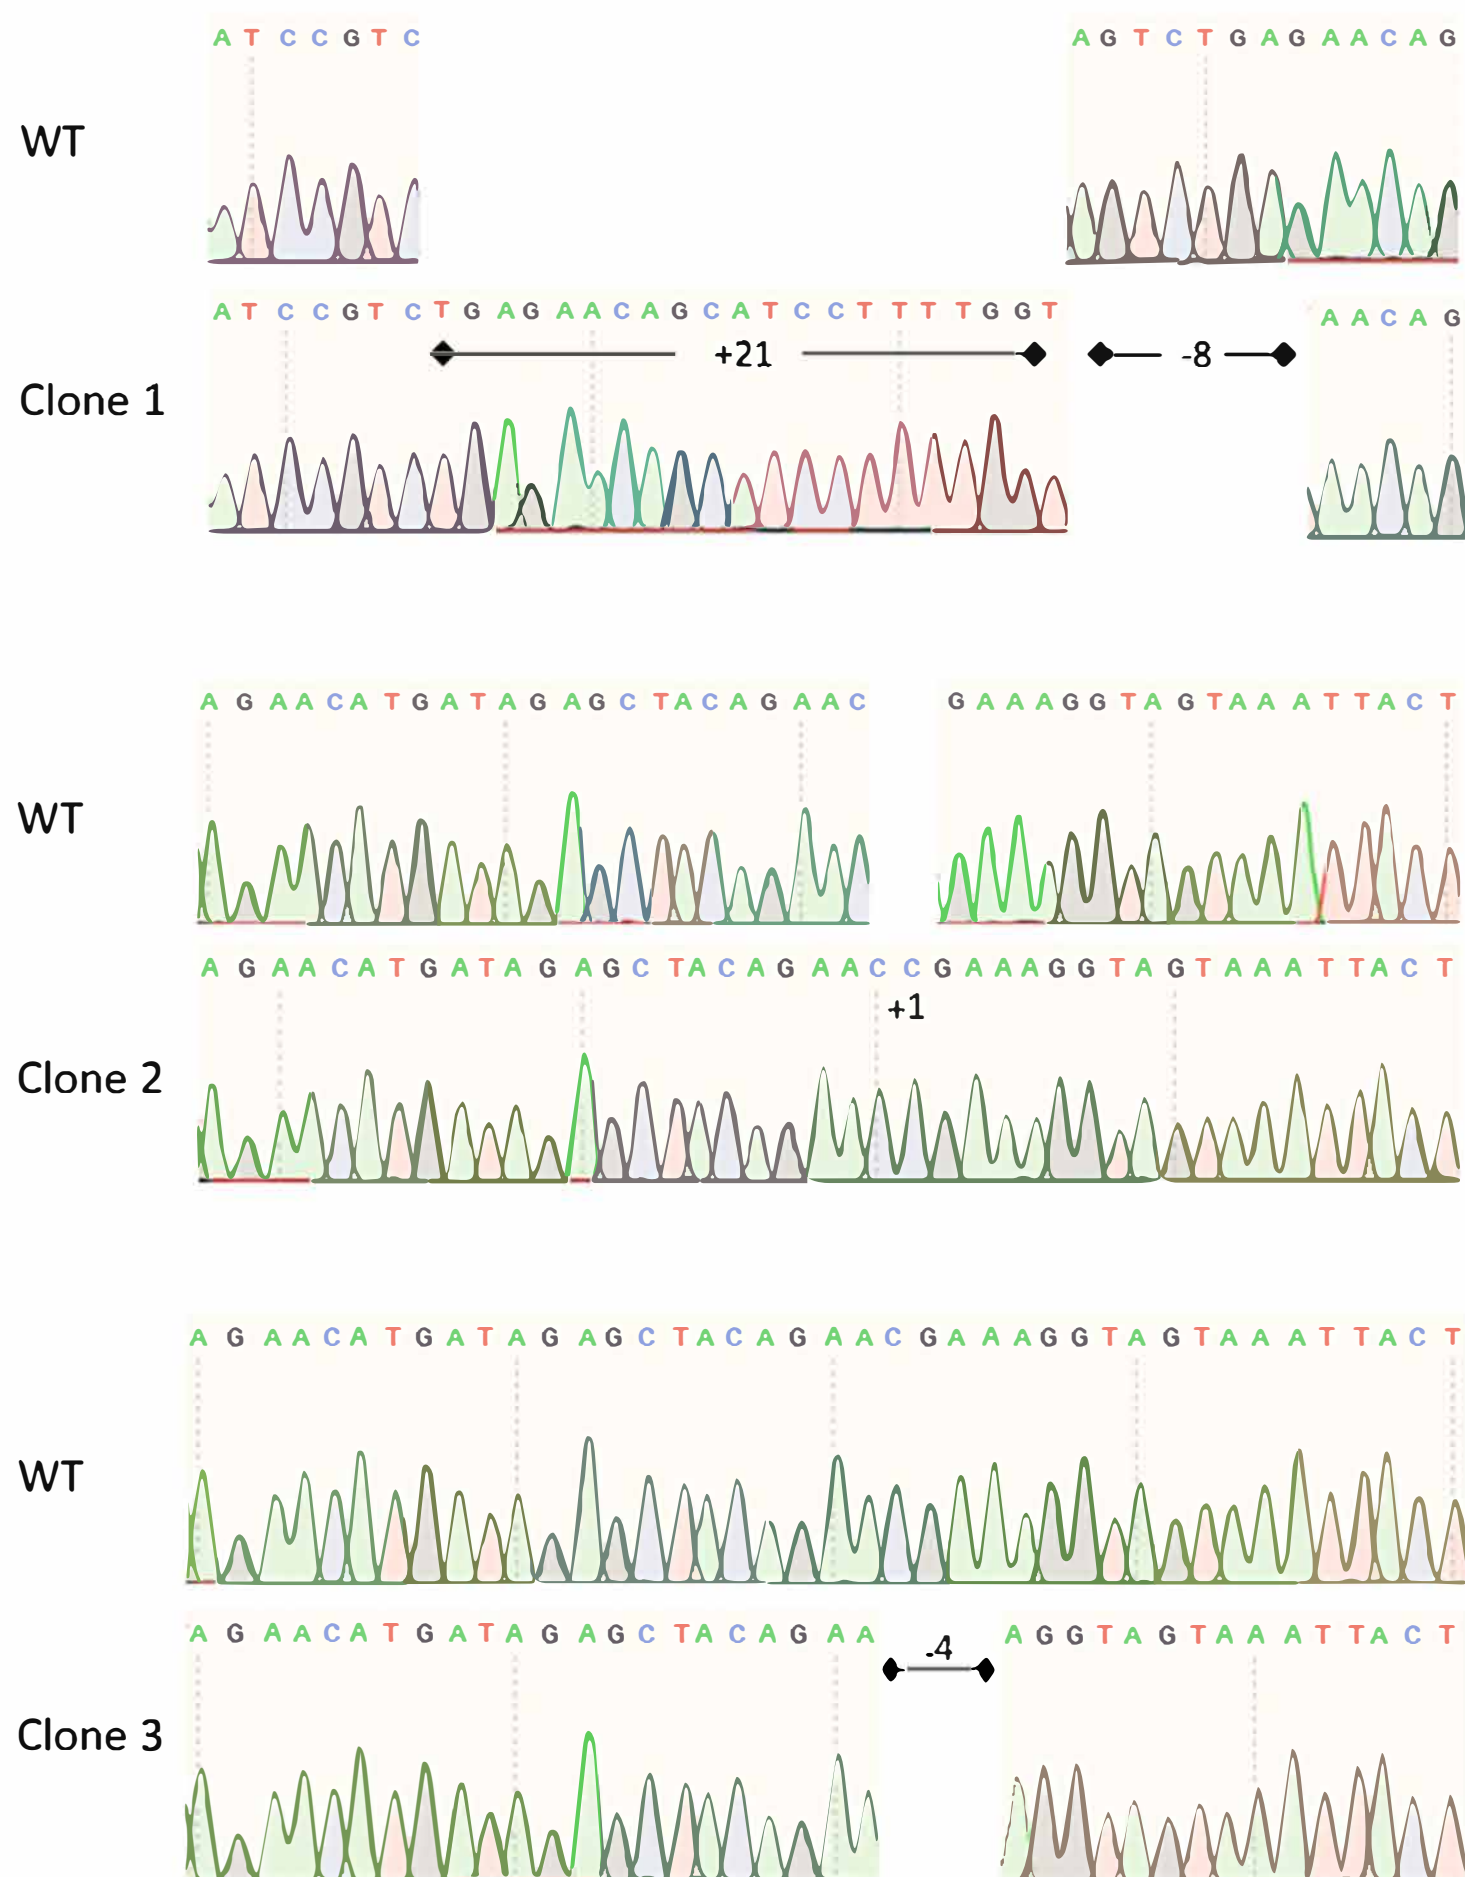

**Supplementary Figure S2.** Validation of ATM-knockout clones. **(A)** Sanger sequencing of ATM-knockout clones compared to WT. Relevant mutations are shown. Clones 1 and 2 had two mutations. In clone 1 the represented mutation resulted in frame shift, and in clone 2 the represented mutation gave rise to an early stop-codon shortly after mutation site. NT- no treatment.

**Supplementary Table S1: Key resources and reagents**

| REAGENT or RESOURCE                                         | SOURCE                       |
|-------------------------------------------------------------|------------------------------|
| <b>Antibodies</b>                                           |                              |
| Mouse anti-human GPDH                                       | abcam, ab8245                |
| Rabbit anti-human ATM [Y170]                                | abcam, ab32420               |
| Rabbit anti-human ATM (phospho S1981) [EP1890Y]             | abcam, ab81292               |
| Mouse anti-human Tubulin                                    | abcam, ab56676               |
| <b>Chemicals, Peptides, and Recombinant Proteins</b>        |                              |
| mTeSR1 medium                                               | STEMCELL Technologies        |
| TrypLE Select                                               | Thermo Fisher Scientific     |
| Dulbecco's Modified Eagle's Medium                          | Sigma                        |
| Knockout Dulbecco's Modified Eagle's Medium (Knockout DMEM) | Thermo Fisher Scientific     |
| Knockout Serum Replacement (KSR)                            | Thermo Fisher Scientific     |
| L-Glutamine                                                 | Biological Industries        |
| Nonessential amino acids                                    | Biological Industries        |
| Penicillin and streptomycin                                 | Biological Industries        |
| $\beta$ -mercaptoethanol                                    | Sigma                        |
| Human basic fibroblast growth factor (bFGF)                 | PeproTech                    |
| Gelatin                                                     | MP Biomedicals               |
| Fetal bovine serum (FBS)                                    | Thermo Fisher Scientific     |
| polyethylenimine "Max" (PEI-Max)                            | Polysciences                 |
| Trypsin-EDTA                                                | Biological Industries        |
| Polybrene                                                   | Sigma                        |
| Puromycin dihydrochloride                                   | Sigma                        |
| Neomycin (G418)                                             | Sigma                        |
| Matrigel Growth Factor Reduced (GFR)                        | Corning                      |
| SB431542                                                    | Biogems                      |
| LDN193189                                                   | Biogems                      |
| N-2 supplement                                              | Thermo Fisher                |
| Ascorbic acid                                               | Sigma                        |
| D-Glucose                                                   | BDH                          |
| 16% PFA                                                     | Electron Microscopy Sciences |
| DPBS                                                        | Sigma-Aldrich                |
| Bovine serum albumin (BSA)                                  | MP Biomedicals               |
| SDS                                                         | Bio-Rad                      |
| TRIS base                                                   | Bio-Lab                      |
| Glycine                                                     | J-T Baker                    |
| Methanol                                                    | Sigma                        |
| Bisacrylamide                                               | Biological Industries        |
| Tetramethylethylenediamine (TEMED)                          | Sigma                        |
| Nonfat milk powder                                          | BD                           |
| Nitrocellulose blotting membrane                            | BioTrace                     |
| Hoechst33342                                                | Sigma                        |
| KU-55933                                                    | Sigma                        |

|                                                                                |                                                         |
|--------------------------------------------------------------------------------|---------------------------------------------------------|
| CGP3466B maleate                                                               | Tocris                                                  |
| Lats-IN-1                                                                      | MedChemExpress (MCE)                                    |
| Neocarzinostatin- NCS                                                          | Sigma                                                   |
| <b>Critical Commercial Assays</b>                                              |                                                         |
| Enhanced Chemiluminescence Detection (ECL) kit                                 | BioGate                                                 |
| Blood & Cell Culture DNA Midi Kit                                              | Qiagen                                                  |
| Blood/Cell DNA Mini Kit                                                        | Geneaid                                                 |
| Nextera XT Index Kit, 96 indices, 384 samples                                  | Illumina                                                |
| RNeasy Mini Kit                                                                | QIAGEN                                                  |
| TruSeq RNA Library Prep Kit                                                    | Illumina                                                |
| <b>Deposited Data</b>                                                          |                                                         |
| RNaseq analysis of ATM-knockout hESCs with or without Hippo pathway inhibition | This study, ArrayExpress Accession number: E-MTAB-12600 |
| <b>Experimental Models: Cell Lines</b>                                         |                                                         |
| Haploid hESCs – h-pES10-based mutant library                                   | <a href="#">Yilmaz et al., 2018</a>                     |
| HEK293T                                                                        | Laboratory of Robert Weinberg                           |
| <b>Oligonucleotides</b>                                                        |                                                         |
| <a href="#">sgRNAs for mutant generation, see Supplementary Table 2</a>        | This study                                              |
| Primers for Library DNA amplification:                                         | <a href="#">Yilmaz et al., 2018</a>                     |
| 5'-TCGTCGGCAGCGTCAGATGTGTATAAGAGACAG                                           |                                                         |
| NNNNNNNNNGGCTTTATATATCTTGTGGAAAGGACG-3' (forward).                             |                                                         |
| 5'-GTCTCGTGGGCTCGGAGATGTGTATAAGAG                                              |                                                         |
| ACAGACGGACTAGCCTTATTTAACTTGC-3' (reverse).                                     |                                                         |
| <b>Recombinant DNA</b>                                                         |                                                         |
| lentiCRISPR v2                                                                 | A gift from Feng Zhang, Addgene Cat# 52961              |
| lentiCRISPR v2-neo                                                             | A gift from Brett Stringer, Addgene Cat# 98292          |
| pCMV-VSV-G                                                                     | A gift from Bob Weinberg, Addgene Cat# 8454             |
| psPAX2                                                                         | A gift from Didier Trono, Addgene Cat# 12260            |
| <b>Software and Algorithms</b>                                                 |                                                         |
| Flowjo software (FlowJo LLC)                                                   | BD                                                      |
| ImageJ software                                                                | NIH                                                     |
| Bowtie 2 aligner                                                               | Langmead and Salzberg, 2012                             |
| R (version 4.0.2)                                                              | R Core Team                                             |
| STAR (version 2.5)                                                             | <a href="#">Dobin et al., 2013</a>                      |
| EdgeR                                                                          | <a href="#">Robinson et al., 2010</a>                   |
| GSEA                                                                           | Subramanian et al., 2005; Mootha et al., 2003           |
| Illustrator                                                                    | Adobe Ink.                                              |
| OMIM                                                                           | JHUSOM                                                  |
| STRING                                                                         | <a href="#">Szklarczyk et al., 2019</a>                 |

|                              |                |
|------------------------------|----------------|
| <b>Others</b>                |                |
| BD Biosciences FACS Aria III | BD Biosciences |
| Illumina NextSeq 500         | Illumina       |
| Gel Imager – ChemiDoc        | Bio-Rad        |

**Supplementary Table S2: Sequences of sgRNAs and primers used in this work**

| Name            | Sequence                  | SOURCE                                                                                                                                                |
|-----------------|---------------------------|-------------------------------------------------------------------------------------------------------------------------------------------------------|
| SAV1_1          | CACCGGAGCGAGAAGGACTTCCTCC | This study                                                                                                                                            |
|                 | AAACGGAGGAAGTCCTTCTCGCTCC |                                                                                                                                                       |
| SAV1_2          | CACCGGAAGATTTACCCCTTCCTCC | This study                                                                                                                                            |
|                 | AAACGGAGGAAGGGGTAAATCTTCC |                                                                                                                                                       |
| BAG6_1          | CACCGGGCATTCCGGTCATGAACAG | This study                                                                                                                                            |
|                 | AAACCTGTTCATGACCGGAATGCCC |                                                                                                                                                       |
| BAG6_2          | CACCGGATGACCCTCGGGTGGCTGG | This study                                                                                                                                            |
|                 | AAACCCAGCCACCCGAGGGTCATCC |                                                                                                                                                       |
| NF2_1           | CACCGCGTCACCATGGACGCCGAGA | This study                                                                                                                                            |
|                 | AAACTCTCGGCGTCCATGGTGACGC |                                                                                                                                                       |
| NF2_2           | CACCGTCTTTGAGCCTACCTTGCC  | This study                                                                                                                                            |
|                 | AAACGGCCAAGGTAGGCTCAAAGAC |                                                                                                                                                       |
| ATM_1           | CACCGGGATGCTGTTCTCAGACTGA | Mancikova V, Peschelova H, Kozlova V, et al. <i>J Immunother Cancer</i> . 2020                                                                        |
|                 | AAACTCAGTCTGAGAACAGCATCCC |                                                                                                                                                       |
| ATM_2           | CACCGTGATAGAGCTACAGAACGAA | <a href="https://www.genscript.com/gRNA-detail/472/ATM-CRISPR-guide-RNA.html">https://www.genscript.com/gRNA-detail/472/ATM-CRISPR-guide-RNA.html</a> |
|                 | AAACTTCGTTCTGTAGCTCTATCAC |                                                                                                                                                       |
| ATM<br>Primer_1 | AATGTTTCTGCGACCTGGCT      | This study                                                                                                                                            |
|                 | TGGTCAACAGAACATCAGCA      |                                                                                                                                                       |
| ATM<br>Primer_2 | GCCTTTGACCAGAATGTGCC      | This study                                                                                                                                            |
|                 | GGATCTCGAATCAGGCGCTT      |                                                                                                                                                       |

**Supplementary Table S3: List of significantly enriched genes**

| Gene name | LogFC       | P-value     | FDR         |
|-----------|-------------|-------------|-------------|
| TP53      | 7.512286008 | 0           | 0           |
| NF2       | 6.108048769 | 3.44169E-15 | 1.54334E-11 |
| PMAIP1    | 5.816833807 | 4.44089E-16 | 3.98281E-12 |
| USP28     | 4.379876922 | 2.18714E-14 | 7.84614E-11 |
| PTEN      | 4.317473273 | 1.33227E-15 | 7.96563E-12 |
| BAX       | 3.585787711 | 6.89959E-12 | 2.06263E-08 |
| BAG6      | 2.760837158 | 5.97437E-06 | 0.004584978 |
| SAV1      | 2.602537902 | 1.24668E-07 | 0.000172013 |
| TRIP12    | 2.550769023 | 0.000120099 | 0.039893013 |
| TP53BP1   | 2.519246808 | 4.64766E-07 | 0.000521031 |
| MNT       | 2.467479357 | 5.82482E-07 | 0.000614587 |
| ZMYM2     | 2.463923901 | 1.01943E-11 | 2.61221E-08 |
| SCAF8     | 2.414556554 | 2.52604E-05 | 0.012636094 |
| RNF111    | 2.192468616 | 1.80591E-05 | 0.010122683 |
| MAP4K4    | 2.101044185 | 7.94038E-10 | 1.58252E-06 |
| TAOK1     | 2.071581426 | 5.40145E-05 | 0.022019509 |
| SPRY4     | 2.041237627 | 4.07359E-05 | 0.01739715  |
| RASA2     | 2.03722462  | 2.78411E-06 | 0.002496933 |
| TADA2B    | 2.028638562 | 1.18275E-06 | 0.001116575 |
| L3MBTL3   | 1.963170732 | 1.52174E-08 | 2.27462E-05 |
| KDM5C     | 1.857713228 | 5.41038E-06 | 0.004411182 |
| HIST1H1D  | 1.843353965 | 1.32638E-05 | 0.008496912 |
| FAM193A   | 1.826806566 | 1.8864E-07  | 0.000225575 |
| FLCN      | 1.758860772 | 1.62459E-07 | 0.000208145 |
| PLEKHA1   | 1.743746907 | 3.65482E-09 | 5.95969E-06 |
| CCDC6     | 1.740523005 | 1.1368E-06  | 0.001116575 |
| CHEK2     | 1.733310331 | 4.62777E-10 | 1.0376E-06  |
| CHI3L1    | 1.631426245 | 0.000171789 | 0.049035386 |
| HYAL1     | 1.623068074 | 2.41799E-05 | 0.012636094 |
| ACSL3     | 1.616442674 | 0.000136934 | 0.042347982 |
| PGAP2     | 1.597455709 | 0.000123089 | 0.040142747 |
| HIST1H1B  | 1.441349734 | 6.13478E-06 | 0.004584978 |
| ZNF460    | 1.38140037  | 3.03954E-05 | 0.014735179 |
| DCUN1D3   | 1.371981783 | 0.000112015 | 0.038638836 |
| LZTR1     | 1.344562764 | 4.19006E-05 | 0.017478382 |
| ZNF436    | 1.340002352 | 0.00015145  | 0.046043394 |
| FBXO42    | 1.33165945  | 1.67989E-05 | 0.010007807 |
| TSC2      | 1.276067528 | 1.00167E-05 | 0.006654428 |
| RASA1     | 1.199555698 | 2.42699E-05 | 0.012636094 |
| PAWR      | 1.023678405 | 2.5361E-05  | 0.012636094 |
| MYL6      | 0.982927044 | 9.01526E-06 | 0.006219488 |
| SLC26A10  | 0.978969533 | 3.77537E-05 | 0.016516769 |
| METTL23   | 0.966129085 | 6.38672E-05 | 0.02545747  |
| OSTN      | 0.930079719 | 0.00010315  | 0.037003887 |
| PLD5      | 0.915255715 | 0.000131894 | 0.041810837 |
| KRT27     | 0.880652745 | 8.27186E-05 | 0.030280056 |
| SEC11C    | 0.861761275 | 0.000132866 | 0.041810837 |
| HPCA      | 0.857193322 | 6.61946E-05 | 0.025811574 |

|         |             |             |             |
|---------|-------------|-------------|-------------|
| NEURL1B | 0.746428307 | 3.57995E-05 | 0.016516769 |
|---------|-------------|-------------|-------------|
